# Supplementary material for: Atypical B cells and impaired SARS-CoV-2 neutralisation following booster vaccination in the elderly
Source: bioRxiv or medRxiv preprint supplement (doi:10.1101/2022.10.13.22281024), 2022-10-13

## Supplementary figure 1

---

|                                         | <b>&lt;70</b>       | <b>≥70</b>            |                |
|-----------------------------------------|---------------------|-----------------------|----------------|
| <b>n</b>                                | 23                  | 13                    |                |
| <b>Female %</b>                         | 69.6                | 69.2                  |                |
| <b>Median age (IQR)</b>                 | 66                  | 73                    |                |
| <b>Sera GMT WT</b>                      |                     |                       |                |
| <b>D2V1</b>                             | 408.4 (157 - 1063)  | 266 (111.4 - 635.5)   |                |
| <b>D2V3</b>                             | 179.9 (86.11 - 376) | 97.68 (35.54 - 268.5) |                |
| <b>D3V1</b>                             | 5749 (1683 - 19633) | 1093 (228.8 - 5218)   |                |
| <b>Sera ID50&lt;20</b>                  |                     |                       |                |
| <b>D2V1</b>                             | 21 (6/23)           | 8 (1/13)              |                |
| <b>D2V3</b>                             | 21 (6/23)           | 11 (2/13)             |                |
| <b>D3V1</b>                             | 7 (2/23)            | 8 (1/13)              |                |
| <b>Time between dose 2 &amp; dose 3</b> | 200.5               | 201.5                 | median = 200.5 |

---

# Supplementary figure 2

A

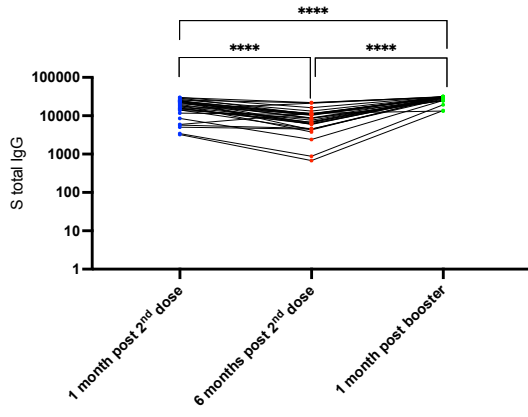

B

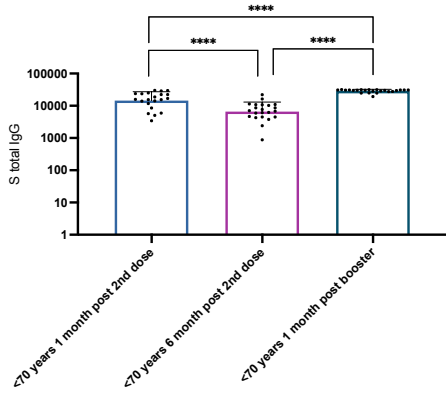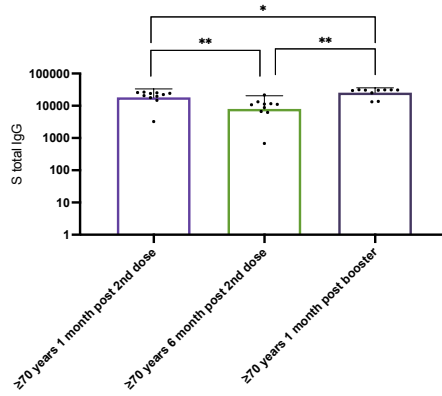

C

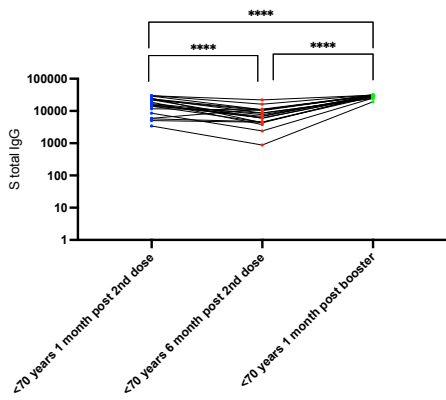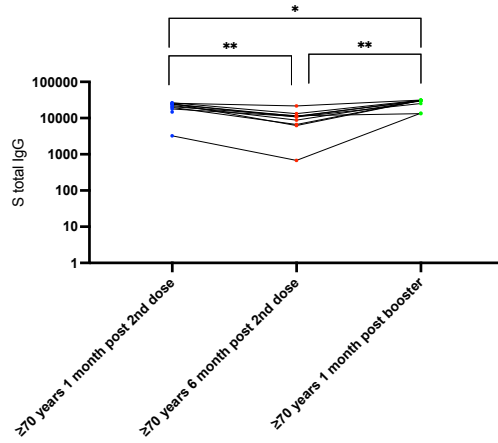

# Supplementary figure 3

A

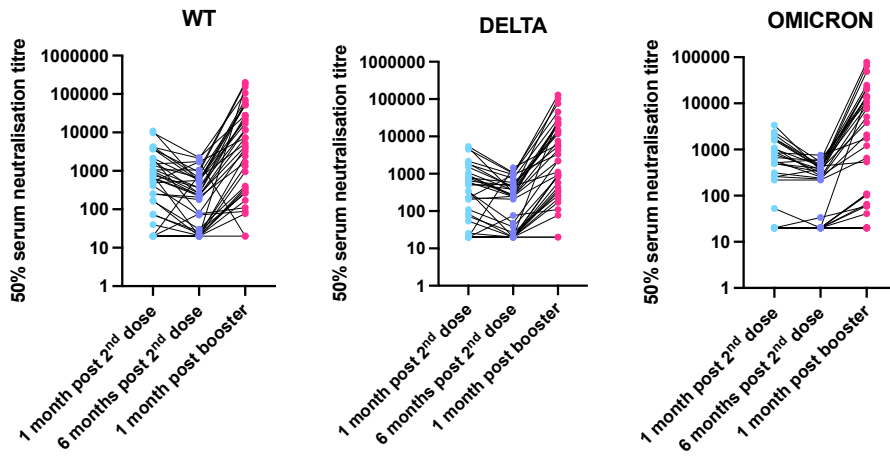

B

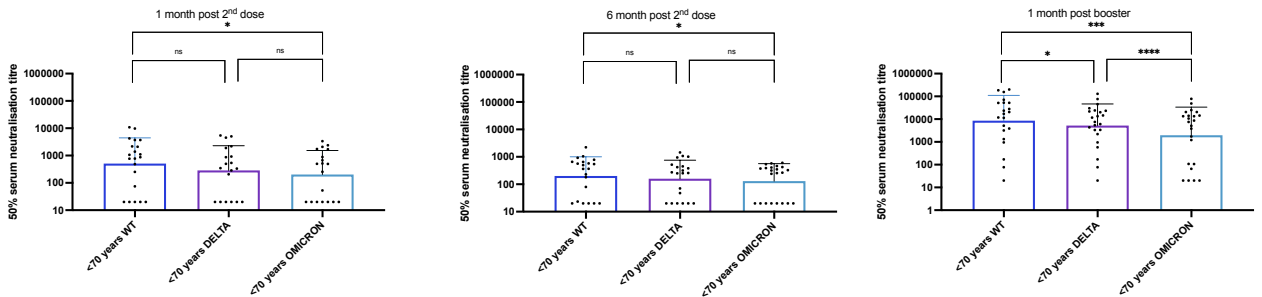

C

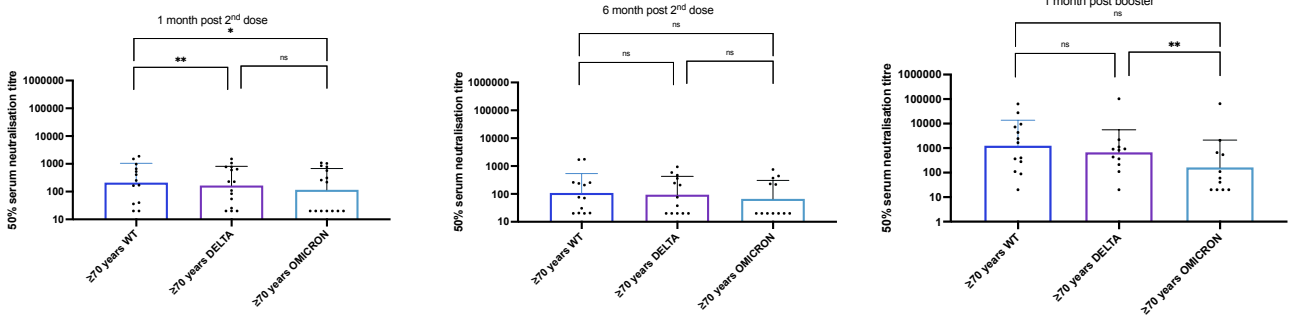

D

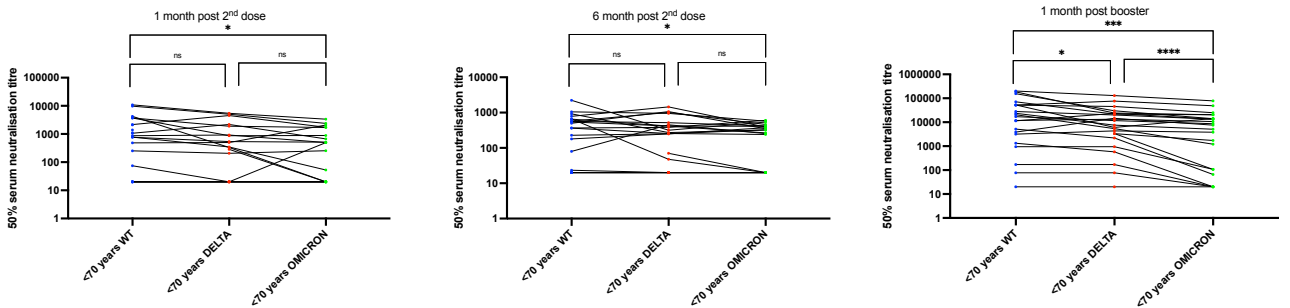

E

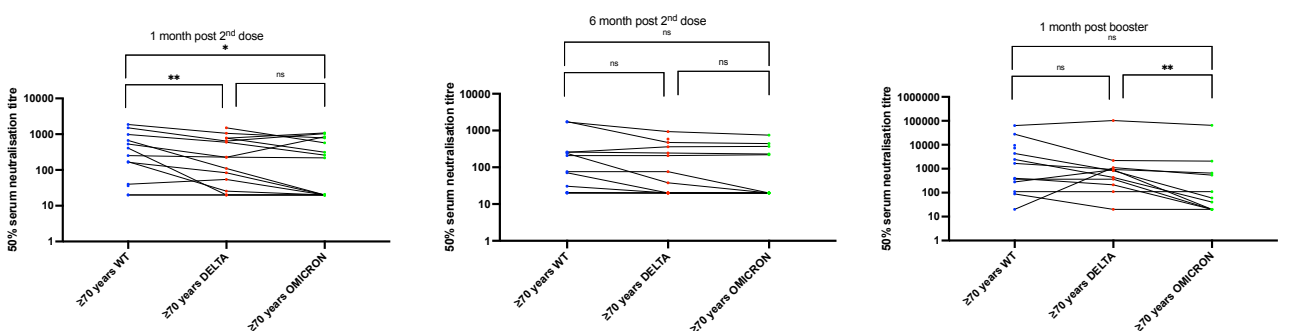

# Supplementary figure 4

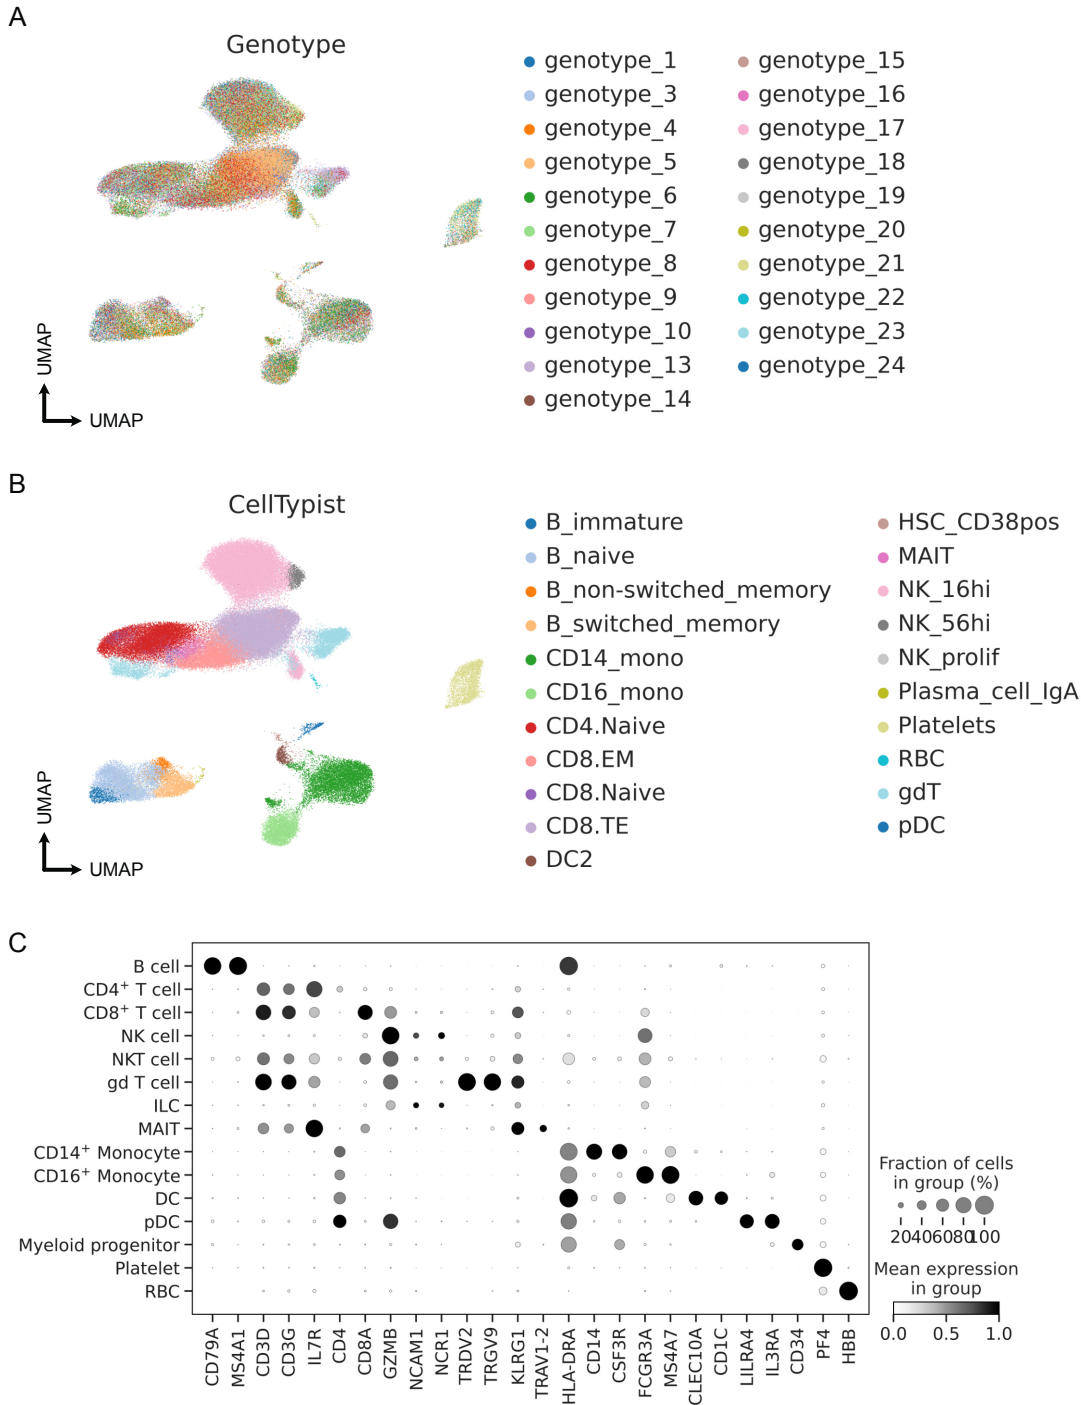

# Supplementary figure 5

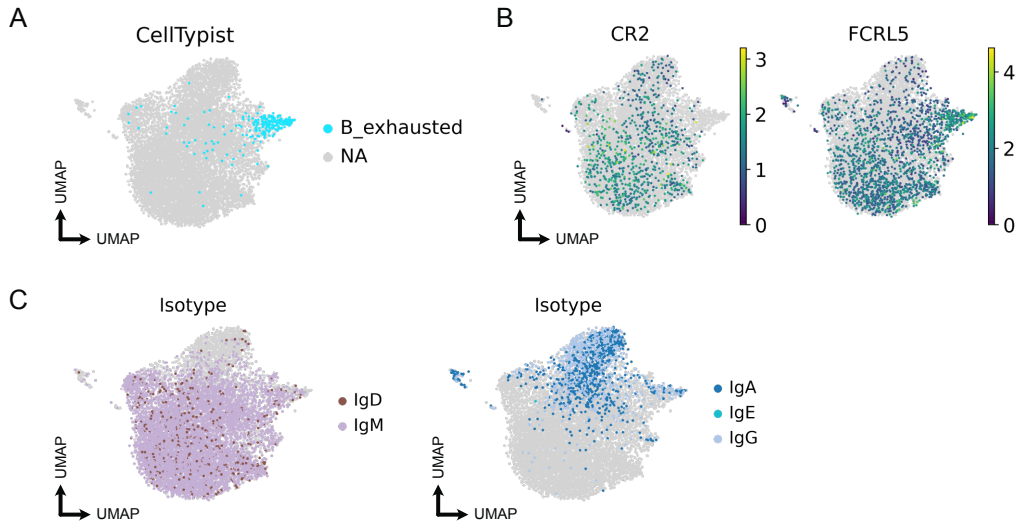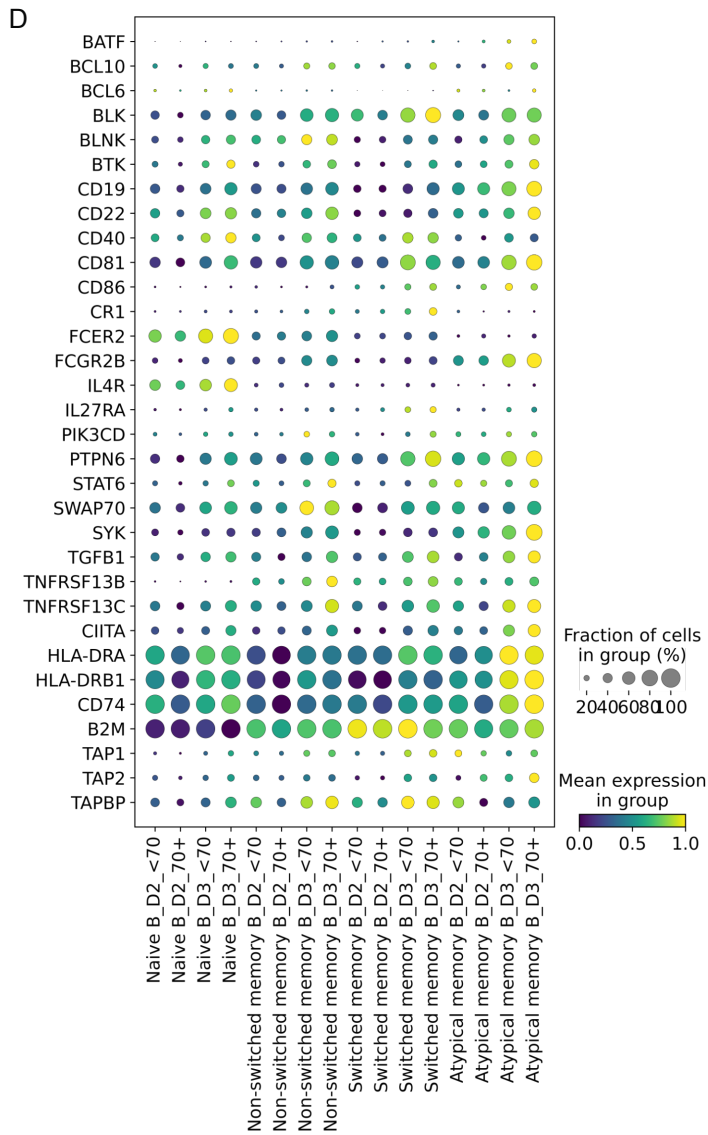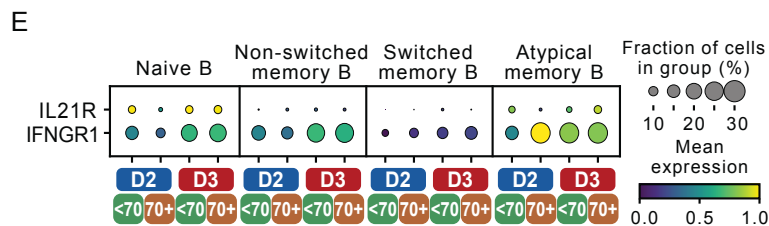

# Supplementary figure 6

A

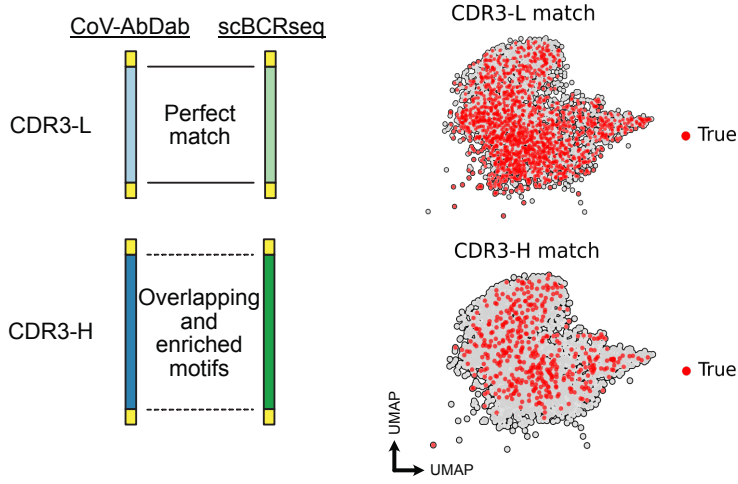

B

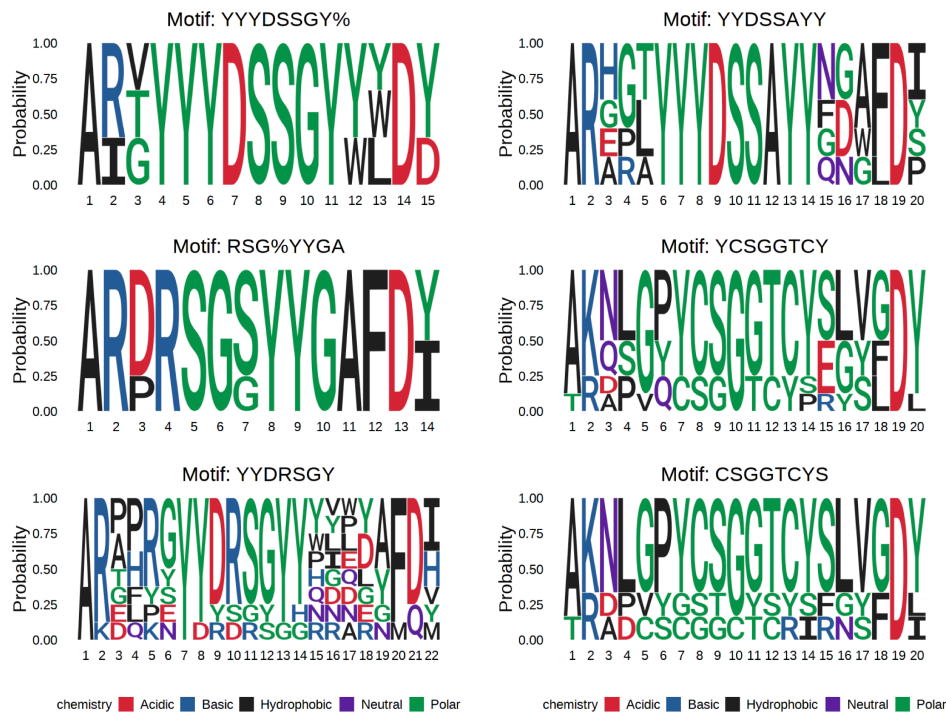

C

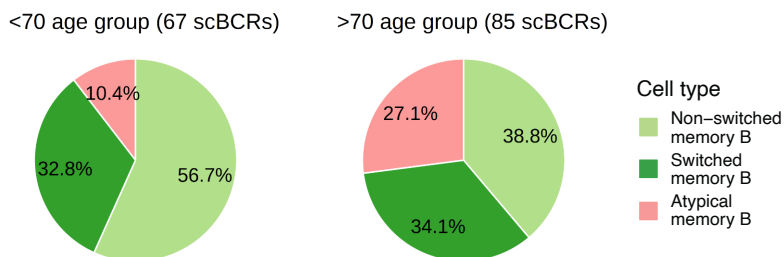

# Supplementary figure 7

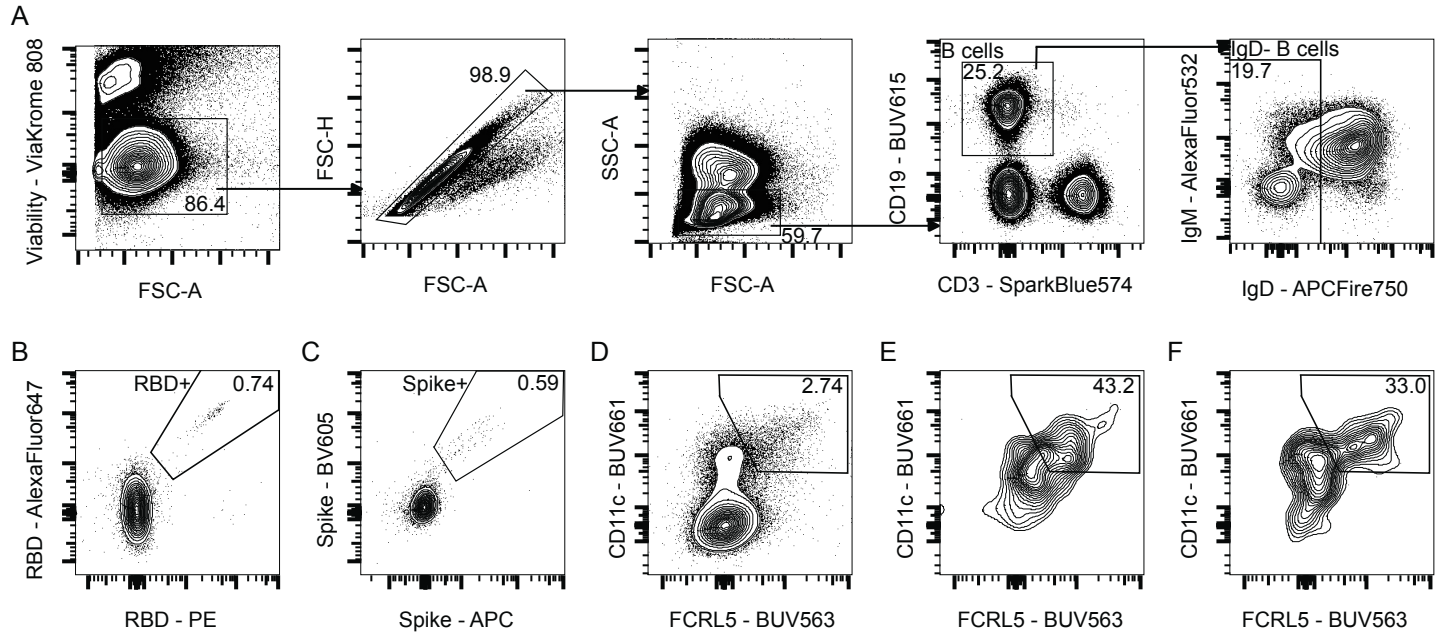

# Supplementary figure 8

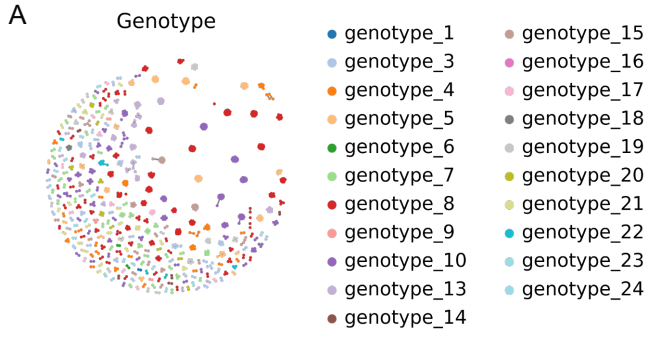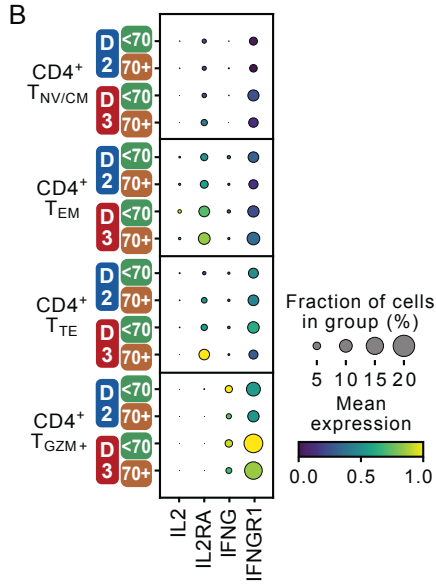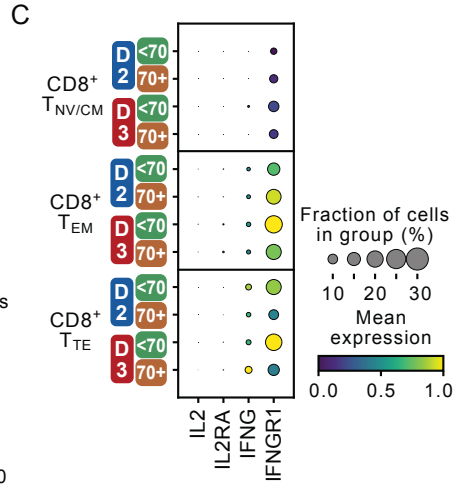



# Supplementary figure 9

A

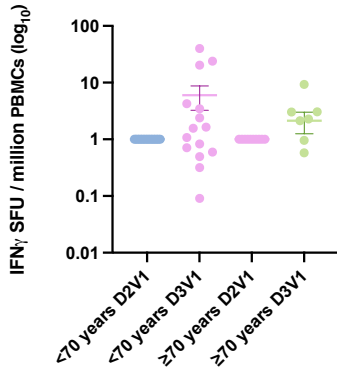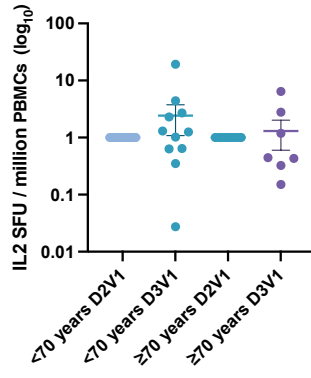

B

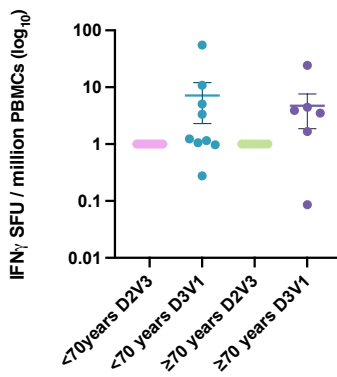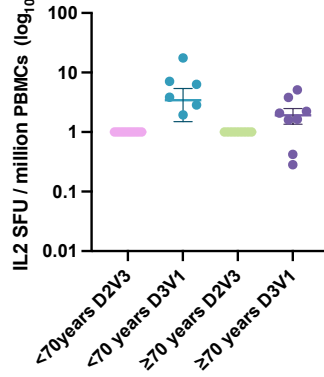

# Supplementary figure 10

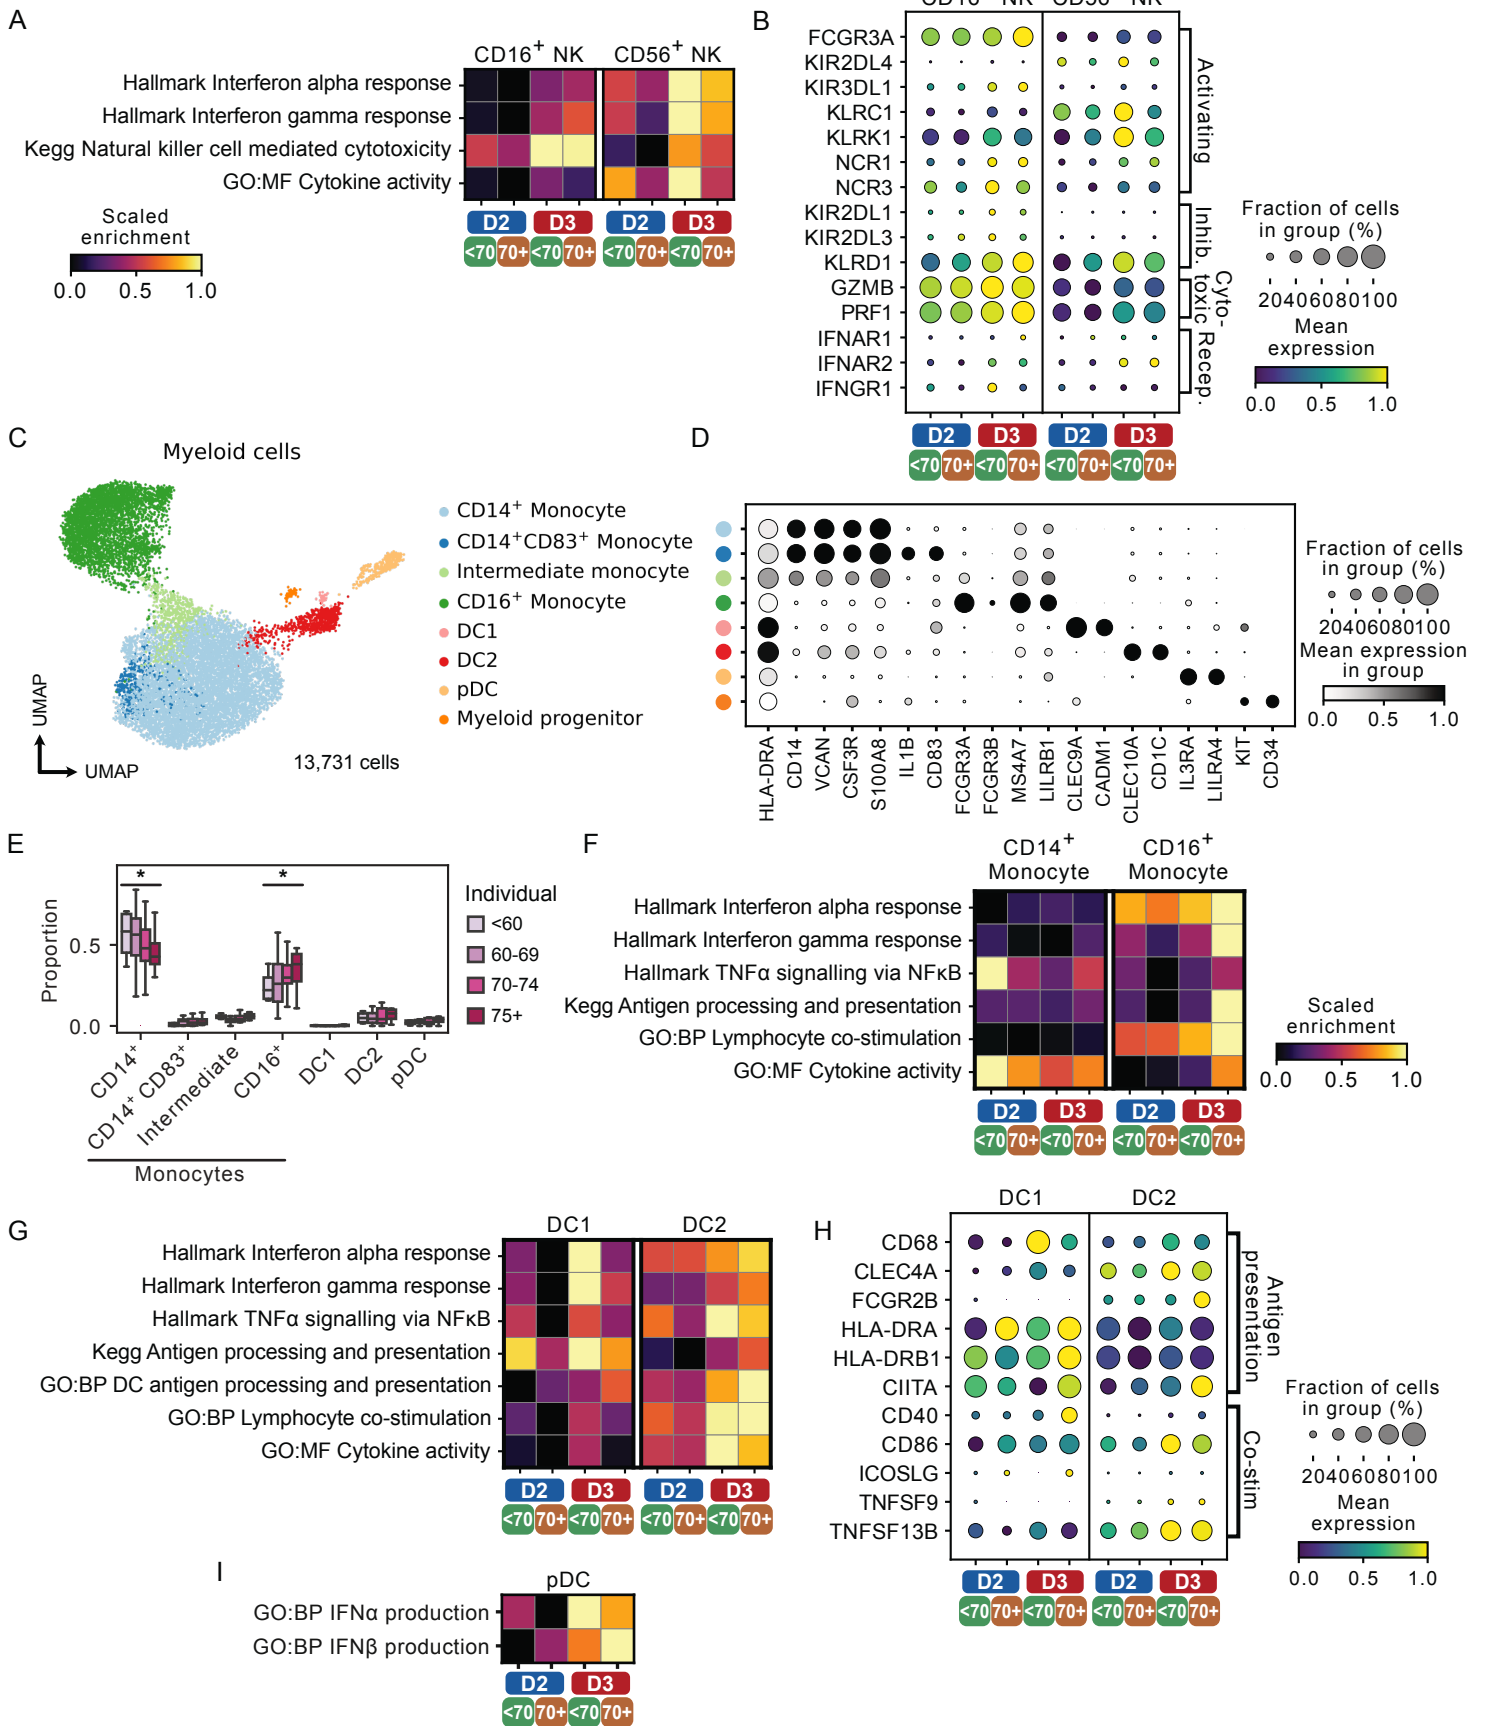

Supplement: Supplementary file [file media-1.pdf]
